# Supplementary material for: Assessing Associations between the AURKA-HMMR-TPX2-TUBG1 Functional Module and Breast Cancer Risk in BRCA1/2 Mutation Carriers
Source: PLoS One. 2015 Apr 1;10(4):e0120020. doi: 10.1371/journal.pone.0120020 (PMC4382299; doi:10.1371/journal.pone.0120020)
Supplement: S1 Table — (XLSX) [file pone.0120020.s002.xlsx]

## Sheet: SNPs_Results
Table S1. Genotyped variants and breast cancer association results.
BRCA1 mutation carriers												BRCA2 mutation carriers
SNP	Chromosome	Position (bp)	Gene candidate	Allele 1	Allele 2	MAF breast cancer unaffected	MAF breast cancer affected	p value	FDR-adjusted p value	Log HR		SNP	MAF breast cancer unaffected	MAF breast cancer affected	P value	FDR-adjusted p value	Log HR
rs1379856	5	162337711	HMMR proximal	A	G	0.230836	0.23229	0.703451	0.969923	0.00959988		rs1379856	0.226827	0.224214	0.77905	0.969923	-0.0101105
rs728150	5	162371233	HMMR proximal	C	G	0.00404258	0.00361011	0.649433	0.969923	-0.0790528		rs728150	0.00438596	0.00358879	0.80547	0.969923	-0.058279
rs7724090	5	162474044	HMMR proximal	T	A	0.0320633	0.0313703	0.857339	0.969923	0.0110487		rs7724090	0.033883	0.0295612	0.259696	0.834923	-0.0979885
rs4645345	5	162486117	HMMR proximal	A	G	0.0201878	0.0193023	0.431781	0.864	-0.0604224		rs4645345	0.0208763	0.021252	0.473536	0.864	0.075043
rs12187751	5	162518223	HMMR proximal	A	G	0.078605	0.0743876	0.474032	0.864	-0.0284636		rs12187751	0.0784592	0.0748441	0.90826	0.969923	0.00656138
rs2069368	5	162803304	HMMR	G	C	0.000134138	0.000384813	0.228825	0.81	0.797798		rs2069368	NA	NA	NA	NA	NA
rs177250	5	162807979	HMMR	A	G	0.240558	0.252327	0.00159179	0.04293	0.0782606		rs177250	0.243491	0.241507	0.85179	0.969923	-0.00656857
rs299302	5	162809414	HMMR	G	A	0.287324	0.29746	0.00562387	0.091044	0.0650329		rs299302	0.290776	0.287529	0.84949	0.969923	-0.00629208
rs6877450	5	162810223	HMMR	A	G	0.0479544	0.0459851	0.446437	0.864	-0.0383572		rs6877450	0.0468951	0.0461058	0.891814	0.969923	0.00978269
rs2303076	5	162820228	HMMR	G	A	0.227364	0.225366	0.299057	0.837	-0.026506		rs2303076	0.236856	0.231986	0.362963	0.864	-0.0323941
rs3756648	5	162824472	HMMR	G	A	0.486584	0.47741	0.0690444	0.349312	-0.0387985		rs3756648	0.472552	0.48104	0.330848	0.837	0.029493
rs299284	5	162829228	HMMR	G	A	0.117438	0.123701	0.0404731	0.32805	0.0666884		rs299284	0.115048	0.119169	0.656003	0.969923	0.0208635
rs2303078	5	162833734	HMMR	G	A	0.0470154	0.0447024	0.307884	0.837	-0.0519678		rs2303078	0.0453725	0.0453811	0.650985	0.969923	0.0329018
rs299290	5	162835094	HMMR	A	G	0.238961	0.25154	0.000747437	0.04293	0.0833296		rs299290	0.244006	0.241511	0.742456	0.969923	-0.0115554
rs299295	5	162842294	HMMR	G	A	0.229287	0.24243	0.00136986	0.04293	0.0802114		rs299295	0.23556	0.228637	0.292321	0.837	-0.0376426
rs299318	5	162849344	HMMR	G	A	0.0391683	0.0386046	0.549192	0.953043	-0.0329709		rs299318	0.0372327	0.0387991	0.45155	0.864	0.0600569
rs299319	5	162850312	HMMR	A	G	0.239133	0.248878	0.0172626	0.200186	0.0588972		rs299319	0.241753	0.235219	0.333092	0.837	-0.0342599
rs10038157	5	162857364	HMMR	A	G	0.111938	0.11684	0.0536171	0.33318	0.0650114		rs10038157	0.117655	0.111894	0.431704	0.864	-0.037396
rs7734424	5	162864296	HMMR	G	A	0.166801	0.17154	0.341181	0.837	0.0269851		rs7734424	0.160798	0.163064	0.920821	0.969923	0.00408947
rs1484994	20	29769636	TPX2	A	G	0.299463	0.295114	0.426709	0.864	-0.0185456		rs1484994	0.308554	0.301732	0.0963611	0.459318	-0.0545729
rs6060913	20	29790501	TPX2	A	G	0.0785484	0.0779887	0.431145	0.864	-0.0312692		rs6060913	0.0833763	0.0831601	0.88524	0.969923	-0.0078843
rs6060972	20	29875261	TPX2	G	A	0.0788485	0.0779104	0.383032	0.864	-0.0346523		rs6060972	0.083634	0.0836414	0.922755	0.969923	-0.00528446
rs6099111	20	54370639	AURKA	G	A	0.0324614	0.0306528	0.728707	0.969923	-0.02131		rs6099111	0.032337	0.0319861	0.761969	0.969923	-0.0256905
rs16979815	20	54374494	AURKA	G	A	0.166801	0.163204	0.221711	0.81	-0.03517		rs16979815	0.173795	0.169785	0.696394	0.969923	-0.0156292
rs35106507	20	54377820	AURKA	C	G	0.166264	0.161472	0.158588	0.67635	-0.0406293		rs35106507	0.172249	0.167436	0.681511	0.969923	-0.0165153
rs10485805	20	54379190	AURKA	A	G	0.225815	0.218353	0.0616524	0.33318	-0.047969		rs10485805	0.22623	0.224994	0.934461	0.969923	0.00297197
rs6024840	20	54390114	AURKA	A	G	0.258012	0.248393	0.0607094	0.33318	-0.0460758		rs6024840	0.254707	0.247166	0.480324	0.864	-0.0246138
rs1047972	20	54394870	AURKA	G	A	0.157143	0.161601	0.552869	0.953043	0.0174398		rs1047972	0.165764	0.167244	0.842878	0.969923	0.00809669
rs2273535	20	54394948	AURKA	A	T	0.214334	0.208822	0.230047	0.81	-0.0314241		rs2273535	0.211598	0.20841	0.903678	0.969923	-0.00447836
rs6099127	20	54396962	AURKA	G	A	0.0758653	0.071053	0.166704	0.67635	-0.0563406		rs6099127	0.0758318	0.0702403	0.15618	0.67635	-0.0822986
rs6127737	20	54397368	AURKA	G	A	0.20153	0.193714	0.0599361	0.33318	-0.0504029		rs6127737	0.197114	0.193418	0.919277	0.969923	-0.00387434
rs2236208	20	54401300	AURKA	A	G	0.0161074	0.0156531	0.602153	0.969923	-0.0445622		rs2236208	0.019082	0.0163157	0.0448499	0.329891	-0.228736
rs6064387	20	54401566	AURKA	G	A	0.45294	0.456873	0.267841	0.834923	0.0236618		rs6064387	0.457806	0.437413	0.0156627	0.200186	-0.0736717
rs6064389	20	54402142	AURKA	C	A	0.45247	0.456767	0.250039	0.834923	0.0245638		rs6064389	0.455939	0.436128	0.0214985	0.217688	-0.0700668
rs6064391	20	54404793	AURKA	C	A	0.486048	0.487943	0.455382	0.864	0.0159216		rs6064391	0.489691	0.472517	0.0358383	0.3222	-0.0634546
rs16979880	20	54405028	AURKA	A	G	0.0717558	0.0681613	0.325578	0.837	-0.0414459		rs16979880	0.0728468	0.0718909	0.786447	0.969923	-0.0157913
rs2426618	20	54408047	AURKA	A	G	0.444966	0.446983	0.822369	0.969923	-0.00482621		rs2426618	0.440805	0.46379	0.00219584	0.04455	0.0925783
rs10454087	17	37989167	TUBG1	G	A	0.268849	0.266868	0.98891	1	0.000341145		rs10454087	0.274285	0.277598	0.903245	0.969923	0.00413179
rs4793039	17	38013760	TUBG1	A	G	0.211162	0.210611	0.694652	0.969923	-0.0104383		rs4793039	0.256764	0.252771	0.821041	0.969923	-0.00793089
rs11649877	17	38025923	TUBG1	A	G	0.480145	0.477098	0.71089	0.969923	-0.00806542		rs11649877	0.469338	0.46963	0.97208	0.996608	0.00107421
rs2089114	17	38030777	TUBG1	G	A	0.480145	0.477293	0.743426	0.969923	-0.00712532		rs2089114	0.469467	0.4694	0.999942	1	2.24854e-06
