# Supplementary material for: Assessing Associations between the AURKA-HMMR-TPX2-TUBG1 Functional Module and Breast Cancer Risk in BRCA1/2 Mutation Carriers
Source: PLoS One. 2015 Apr 1;10(4):e0120020. doi: 10.1371/journal.pone.0120020 (PMC4382299; doi:10.1371/journal.pone.0120020)
Supplement: S2 Table — (XLSX) [file pone.0120020.s003.xlsx]

## Sheet: Genes-Species
Table S2. Species and genes used in the functional constraint analyses.
HMMR genes (n = 26)			BRCA1 genes (n = 20)
Species	Ensembl Gene ID		Species	Ensembl Gene ID
Homo sapiens	ENSG00000072571		Homo sapiens	ENSG00000012048
Pan troglodytes	ENSPTRG00000017503		Pan troglodytes	ENSPTRG00000009236
Gorilla gorilla	ENSGGOG00000009942
Pongo abelii	ENSPPYG00000016019		Pongo abelii	ENSPPYG00000008363
Nomascus leucogenys	ENSNLEG00000004676		Nomascus leucogenys	ENSNLEG00000011944
Macaca mulatta	ENSMMUG00000019553		Macaca mulatta	ENSMMUG00000001329
Otolemur garnettii	ENSOGAG00000007640
Mus musculus	ENSMUSG00000020330		Mus musculus	ENSMUSG00000017146
Dipodomys ordii	ENSDORG00000014284
Cavia porcellus	ENSCPOG00000000878
Oryctolagus cuniculus	ENSOCUG00000022126		Oryctolagus cuniculus	ENSOCUG00000003883
Bos taurus	ENSBTAG00000014773		Bos taurus	ENSBTAG00000022520
Tursiops truncatus	ENSTTRG00000001155
Sus scrofa	ENSSSCG00000017022		Sus scrofa	ENSSSCG00000022101
Vicugna pacos	ENSVPAG00000008343
Equus caballus	ENSECAG00000008506		Equus caballus	ENSECAG00000016974
Canis familiaris	ENSCAFG00000017192		Canis familiaris	ENSCAFG00000014600
Ailuropoda melanoleuca	ENSAMEG00000005225		Ailuropoda melanoleuca	ENSAMEG00000000171
Felis catus	ENSFCAG00000023963		Felis catus	ENSFCAG00000013146
Mustela putorius	ENSMPUG00000013195
Myotis lucifugus	ENSMLUG00000001674		Myotis lucifugus	ENSMLUG00000004135
Loxodonta africana	ENSLAFG00000017569		Loxodonta africana	ENSLAFG00000021784
Procavia capensis	ENSPCAG00000003146
Monodelphis domestica	ENSMODG00000007631		Monodelphis domestica	ENSMODG00000015150
Sarcophilus harrisii	ENSSHAG00000007602
			Callithrix jacchus	ENSCJAG00000012938
			Rattus novergicus	ENSRNOG00000020701
			Ictidomys tridecemlineatus	ENSSTOG00000000494
Heterocephalus glaber (NMR Naked mole-rat)	XM_004859284.1		Heterocephalus glaber (NMR Naked mole-rat)	XM_004836425.1
Maximum likelihood trees (estimated from the CDS sequences) built with phyml program:
Unrooted tree topologies used in functional constraints analyses (tree topolgy usumed in the Orthoman database)
