# Supplementary material for: Assessing Associations between the AURKA-HMMR-TPX2-TUBG1 Functional Module and Breast Cancer Risk in BRCA1/2 Mutation Carriers
Source: PLoS One. 2015 Apr 1;10(4):e0120020. doi: 10.1371/journal.pone.0120020 (PMC4382299; doi:10.1371/journal.pone.0120020)
Supplement: S4 Table — (XLS) [file pone.0120020.s005.xls]

## Sheet: M7, M8 tests
Table S4. Positive selection tests.
BRCA1 (mammal species n = 20, total sites n = 4722, analyzed sites n = 4137)
Filtered MSA	Model	LogL	NP	LR statistic	Test 1 (M8-M7)	Test 2 (M8-M8a)	Test 3 (Bs-Bsa)
	M7	-33191.2	40	60.6708	6.69124e-14	-	-
	M8a	-33180	41	-	-	-	-
	M8	-33160.9	42	38.2504	-	6.22257e-10	-
RHAMM (mammal species n = 26, total sites n = 2064, analyzed sites n = 1914)
Filtered MSA	Model	LogL	NP	LR statistic	Test 1 (M8-M7)	Test 2 (M8-M8a)	Test 3 (Bs-Bsa)
	M7	-15926.2	52	22.1542	1.54625e-05	-	-
	M8a	-15918.2	53	-	-	-	-
	M8	-15915.1	54	6.00935	-	0.0142303	-

## Sheet: Positively selected sites
Table S4. Positive selection tests.
BRCA1					RHAMM
PAML position	AA in human	p (w>1)	AA position in human		PAML position	AA in human	p (w>1)	AA position in human	Human SNP (MAFs < 0.01)
315	C	0.501	360		68	S	0.973	72	rs143745216
344	H	0.969	399		94	A	0.804	101	NA
346	G	0.8	401		98	R	0.56	105	rs78114513
347	E	0.915	402		187	V	0.886	198	NA
348	S	0.627	403		266	V	0.869	305	rs146089957
386	H	0.781	448		272	H	0.582	311	NA
387	S	0.571	449		304	I	0.83	343	NA
417	F	0.708	486		335	L	0.701	374	NA
425	R	0.981	494		357	A	0.679	396	NA
445	L	0.506	523		359	R	0.574	398	NA
461	Q	0.576	541		377	L	0.652	416	NA
509	I	0.827	600		393	T	0.913	436	NA
510	H	0.532	601		402	K	0.515	445	rs376375032
526	H	0.787	619		426	S	0.735	469	rs72808225
552	N	0.582	656		436	S	0.864	479	NA
554	M	0.81	658		461	L	0.705	514	NA
565	T	0.534	676		604	T	0.951	671	NA
578	H	0.713	692		618	H	0.522	685	NA
579	D	0.508	693		330	V/A	<0.5	369	rs299290
587	K	0.615	701
594	S	0.916	708
595	F	0.703	709
600	S	0.525	714
609	P	0.592	727
616	V	0.633	738
621	M	0.817	751
628	L	0.588	758
653	L	0.5	791
662	K	0.676	800
663	C	0.907	801
664	V	0.716	802
677	I	0.692	815
678	H	0.676	816
693	H	0.966	835
730	H	0.824	888
732	G	0.996	890
733	S	0.711	891
747	N	0.747	924
748	I	0.917	925
760	N	0.862	941
763	G	0.649	949
768	N	0.682	961
774	T	0.7	967
778	H	0.523	971
802	N	0.742	1018
816	N	0.768	1034
818	F	0.745	1037
821	A	0.723	1039
829	L	0.806	1072
840	M	0.624	1083
851	Y	0.543	1094
857	G	0.89	1100
866	K	0.758	1110
869	Y	0.509	1113
885	H	0.893	1141
886	A	0.538	1142
900	T	0.877	1163
906	D	0.573	1169
915	F	0.777	1193
916	T	0.881	1194
917	Y	0.774	1202
920	G	0.901	1205
930	L	0.988	1216
948	N	0.58	1235
950	I	0.589	1237
961	L	0.547	1252
971	L	0.727	1263
976	H	0.556	1284
981	T	0.781	1289
995	L	0.916	1303
999	T	0.657	1307
1032	V	0.511	1378
1036	C	0.837	1382
1077	N	0.885	1427
1084	L	0.679	1439
1088	R	0.889	1443
1090	P	0.597	1445
1110	G	0.694	1492
1117	E	0.582	1499
1118	V	0.843	1500
1120	A	0.732	1502
1123	S	0.631	1505
1124	T	0.552	1506
1131	V	0.642	1514
1137	C	0.529	1522
1140	L	0.833	1525
1157	Y	0.835	1543
1163	I	0.556	1549
1188	F	0.952	1683
1192	Y	0.586	1687
1205	L	0.811	1700
1310	Q	0.549	1806
1325	L	0.669	1821
1326	G	0.671	1822
1346	A	0.522	1844
1367	L	0.557	1865
