# Supplementary material for: Assessing Associations between the AURKA-HMMR-TPX2-TUBG1 Functional Module and Breast Cancer Risk in BRCA1/2 Mutation Carriers
Source: PLoS One. 2015 Apr 1;10(4):e0120020. doi: 10.1371/journal.pone.0120020 (PMC4382299; doi:10.1371/journal.pone.0120020)
Supplement: S5 Table — (XLSX) [file pone.0120020.s006.xlsx]

## Sheet: Funding
Table S5. Additional acknowledgements and funding support details.
Study	Funding	Acknowledgements	Individual contributors (not listed as authors) and contact investigators
BCFR - all	This work was supported by grant UM1 CA164920 from the National Cancer Institute. The content of this manuscript does not necessarily reflect the views or policies of the National Cancer Institute or any of the collaborating centers in the Breast Cancer Family Registry (BCFR), nor does mention of trade names, commercial products, or organizations imply endorsement by the US Government or the BCFR.		Huntsman Cancer Institute, University of Utah School of Medicine, Salt Lake City, Utah: Saundra Buys. BCFR contact: David E. Godlgar, E-mail: david.goldgar@hsc.utah.edu.
BCFR-AU		Maggie Angelakos, Judi Maskiell, Gillian Dite, and Helen Tsimiklis.
BCFR-PA
BCFR-NC
BCFR-NY		We wish to thank members and participants in the New York site of the Breast Cancer Family Registry for their contributions to the study.
BCFR-ON		We wish to thank members and participants in the Ontario Familial Breast Cancer Registry for their contributions to the study.
BCFR-UT
BFBOCC	BFBOCC is supported by: Lithuania (BFBOCC-LT): Research Council of Lithuania grant LIG-07/2012 and Hereditary Cancer Association (Paveldimo vėžio asociacija); Latvia (BFBOCC-LV) is partly supported by LSC grant 10.0010.08 and in part by a grant from the ESF Nr.2009/0220/1DP/1.1.1.2.0/09/APIA/VIAA/016 and Liepaja's municipal council.	BFBOCC-LT acknowledges Vilius Rudaitis and Laimonas Griškevičius. BFBOCC-LV acknowledges Drs. Janis Eglitis, Anna Krilova and Aivars Stengrevics.
BMBSA	BRCA-gene mutations and breast cancer in South African women (BMBSA) was supported by grants from the Cancer Association of South Africa (CANSA) to Elizabeth J. van Rensburg.	BMBSA : We wish to thank the families who contribute to the BMBSA study.
BRICOH	SLN was partially supported by the Morris and Horowitz Familes Endowed Professorship.	We wish to thank Yuan Chun Ding and Linda Steele for their work in participant enrollment and biospecimen and data management.
CBCS	This work was supported by the NEYE Foundation.
CNIO	This work was partially supported by Spanish Association against Cancer (AECC08), RTICC 06/0020/1060, FISPI08/1120, Mutua Madrileña Foundation (FMMA) and SAF2010-20493.	We thank Alicia Barroso, Rosario Alonso and Guillermo Pita for their assistance.
COH-CCGCRN	City of Hope Clinical Cancer Genetics Community Network and the Hereditary Cancer Research Registry, supported in part by Award Number RC4CA153828 (PI: J. Weitzel) from the National Cancer Institute and the Office of the Director, National Institutes of Health. The content is solely the responsibility of the authors and does not necessarily represent the official views of the National Institutes …
CONSIT TEAM	Funds from Italian citizens who allocated the 5x1000 share of their tax payment in support of the Fondazione IRCCS Istituto Nazionale Tumori, according to Italian laws (INT-Institutional strategic projects ‘5x1000’) to SM. Italian Association for Cancer Research (AIRC) to LO.	Jacopo Azzollini and Daniela Zaffaroni of the Fondazione IRCCS Istituto Nazionale dei Tumori, Milano, Italy; Giuseppe Giannini of Sapienza University of Rome, Italy and the personnnel of the Cogentech Cancer Genetic Test Laboratory, Milan, Italy.
CORE	The CIMBA data management and data analysis were supported by Cancer Research – UK grants C12292/A11174 and C1287/A10118.SH is supported by an NHMRC Program Grant ot GCT. ACA is a Cancer Research -UK Senior Cancer Research Fellow. GCT is an NHMRC Senior Principal Research Fellow.
DKFZ	The DKFZ study was supported by the DKFZ.
DEMOKRITOS	This research has been co-financed by the European Union (European Social Fund – ESF) and Greek national funds through the Operational Program "Education and Lifelong Learning" of the National Strategic Reference Framework (NSRF) - Research Funding Program of the General Secretariat for Research & Technology: ARISTEIA. Investing in knowledge society through the European Social Fund.
EMBRACE	EMBRACE is supported by Cancer Research UK Grants C1287/A10118 and C1287/A11990. D. Gareth Evans and Fiona Lalloo are supported by an NIHR grant to the Biomedical Research Centre, Manchester. The Investigators at The Institute of Cancer Research and The Royal Marsden NHS Foundation Trust are supported by an NIHR grant to the Biomedical Research Centre at The Institute of Cancer Research and The R…	Epidemiological study of BRCA1 & BRCA2 mutation carriers (EMBRACE): Douglas F. Easton is the PI of the study. EMBRACE Collaborating Centres are: Coordinating Centre, Cambridge: Debra Frost, Steve Ellis, Radka Platte, Jo Perkins. North of Scotland Regional Genetics Service, Aberdeen: Zosia Miedzybrodzka, Helen Gregory. Northern Ireland Regional Genetics Service, Belfast: Patrick Morrison, Lisa Jef…	Zosia Miedzybrodzka, Patrick J. Morrison, Kai-Ren Ong, Alan Donaldson, Marc Tischkowitz, Mark T. Rogers, M. John Kennedy, Mary E. Porteous, Carole Brewer, Rosemarie Davidson, Louise Izatt, Helen Gregory, Angela Brady , Julian Barwell, Julian Adlard, Claire Foo , D. Gareth Evans, Lucy E. Side, Jacqueline Eason, Alex Henderson, Lisa Walker, Ros Eeles, Jackie Cook, Shirley Hodgson, Diana Eccles, Ale…
FCCC	The authors acknowledge support from The University of Kansas Cancer Center (P30 CA168524) and the Kansas Bioscience Authority Eminent Scholar Program. A.K.G. was funded by 5U01CA113916, R01CA140323, and by the Chancellors Distinguished Chair in Biomedical Sciences Professorship.	We thank Ms. JoEllen Weaver and Dr. Betsy Bove for their technical support.
GC-HBOC	The German Consortium of Hereditary Breast and Ovarian Cancer (GC-HBOC) is supported by the German Cancer Aid (grant no 109076, Rita K. Schmutzler) and by the Center for Molecular Medicine Cologne (CMMC).	This study was kindly supported by the German Cancer Aid to R. K. Schmutzler (grant no 109076) and by the Center for Molecular Medicine Cologne (CMMC). We are very thankful to all family members who participated in this study, Dieter Schäfer, Center Frankfurt, for providing DNA samples and Juliane Köhler for excellent technical assistance.
GEMO	The study was supported by the Ligue Nationale Contre le Cancer; the Association “Le cancer du sein, parlons-en!” Award; the Canadian Institutes of Health Research for the "CIHR Team in Familial Risks of Breast Cancer" program and the French National Institute of Cancer (INCa).	Genetic Modifiers of Cancer Risk in BRCA1/2 Mutation Carriers (GEMO) study : National Cancer Genetics Network «UNICANCER Genetic Group», France. We wish to thank all the GEMO collaborating groups for their contribution to this study. GEMO Collaborating Centers are: Coordinating Centres, Unité Mixte de Génétique Constitutionnelle des Cancers Fréquents, Hospices Civils de Lyon - Centre Léon Bérard,…	Unité Mixte de Génétique Constitutionnelle des Cancers Fréquents, Hospices Civils de Lyon - Centre Léon Bérard and Equipe «Génétique du cancer du sein», Centre de Recherche en Cancérologie de Lyon: Carole Verny-Pierre, Nadia Boutry-Kryza, Alain Calender, Sophie Giraud; Service de Génétique Oncologique, Institut Curie, Paris: Marion Gauthier-Villars, Bruno Buecher, Claude Houdayer, Etienne Rouleau…
G-FAST	Tom Van Maerken is a postdoctoral researcher funded by the Fund for Scientific Research Flanders (FWO).	We wish to thank the technical support of Ilse Coene en Brecht Crombez.
GOG	This study was supported by National Cancer Institute grants to the Gynecologic Oncology Group (GOG) Administrative Office and Tissue Bank (CA 27469), the GOG Statistical and Data Center (CA 37517), and GOG's Cancer Prevention and Control Committee (CA 101165). Drs. Greene, Mai and Savage were supported by funding from the Intramural Research Program, NCI.
HCSC	Was supported by a grant RD12/00369/0006 and 12/00539 from ISCIII (Spain),partially supported by European Regional Development FEDER funds.	We acknowledge Alicia Tosar for her technical assistance
HEBCS	The HEBCS was financially supported by the Helsinki University Central Hospital Research Fund, Academy of Finland (132473), the Finnish Cancer Society and the Sigrid Juselius Foundation.	HEBCS would like to thank Drs. Carl Blomqvist and Kirsimari Aaltonen as well as Taru Muranen and RNs Irja Erkkilä and Virpi Palola for their help with the HEBCS data and samples.
HEBON	The HEBON study is supported by the Dutch Cancer Society grants NKI1998-1854, NKI2004-3088, NKI2007-3756, the Netherlands Organization of Scientific Research grant NWO 91109024, the Pink Ribbon grants 110005 and 2014-187.WO76, the BBMRI grant NWO 184.021.007/CP46 and the Transcan grant JTC 2012 Cancer 12-054.	The Hereditary Breast and Ovarian Cancer Research Group Netherlands (HEBON) consists of the following Collaborating Centers: Coordinating center: Netherlands Cancer Institute, Amsterdam, NL: M.A. Rookus, F.B.L. Hogervorst, F.E. van Leeuwen, S. Verhoef, M.K. Schmidt, N.S. Russell, J.L. de Lange, R. Wijnands; Erasmus Medical Center, Rotterdam, NL: J.M. Collée, A.M.W. van den Ouweland, M.J. Hooning,…	Department of Human Genetics, Radboud University Nijmegen Medical Centre, Nijmegen: Arjen R. Mensenkamp; Department of Pathology, Family Cancer Clinic, Erasmus University Medical Center, Rotterdam: Carolien H.M. van Deurzen; Department of Human Genetics, Radboud University Nijmegen Medical Centre, Nijmegen: Carolien M. Kets; Department of Surgery, University Medical Center Utrecht, Utrecht: C.C. …
HUNBOCS	Hungarian Breast and Ovarian Cancer Study was supported by Hungarian Research Grant KTIA-OTKA CK-80745 and the Norwegian EEA Financial Mechanism HU0115/NA/2008-3/ÖP-9.	We wish to thank to Hungarian Breast and Ovarian Cancer Study Group members (Janos Papp, Tibor Vaszko, Aniko Bozsik, Timea Pocza, Judit Franko, Maria Balogh, Gabriella Domokos, Judit Ferenczi, Department of Molecular Genetics, National Institute of Oncology, Budapest, Hungary) and the clinicians and patients for their contributions to this study.
ICO	The ICO-IDIBELL study was supported by grants from the Spanish Ministry of Health ISCIII FIS (PI10/01422, PI12/01528, and PI13/00285) and RTICC (RD12/0036/0008); the Ramón Areces (XV), Eugenio Rodríguez Pascual (2012), and Roses Contra el Cancer (2012) Foundations; the Spanish Association Against Cancer (AECC 2010); and the AGAUR Generalitat de Catalunya (2009-SGR290 and 2009-SGR293).	We wish to thank the members of the ICO Hereditary Cancer Programa and of the Breast Cancer and Systems Biology Unit.
IHCC	The IHCC was supported by Grant PBZ_KBN_122/P05/2004; Katarzyna Jaworska is a fellow of International PhD program, Postgraduate School of Molecular Medicine, Warsaw Medical University, supported by the Polish Foundation of Science.
ILUH	The ILUH group was supported by the Icelandic Association “Walking for Breast Cancer Research”, by the Nordic Cancer Union and by the Landspitali University Hospital Research Fund.
INHERIT	This work was supported by the Canadian Institutes of Health Research for the “CIHR Team in Familial Risks of Breast Cancer” program, the Canadian Breast Cancer Research Alliance-grant #019511 and the Ministry of Economic Development, Innovation and Export Trade – grant # PSR-SIIRI-701.	We would like to thank Dr Martine Dumont, Martine Tranchant for sample management and skillful technical assistance. J.S. is Chairholder of the Canada Research Chair in Oncogenetics.
IOVHBOCS	The study was supported by Ministero dell'Istruzione, dell'Università e della Ricerca and Ministero della Salute.
IPOBCS	This study was in part supported by Liga Portuguesa Contra o Cancro.	We wish to thank Drs. Ana Peixoto, Catarina Santos, Patrícia Rocha and Pedro Pinto for their skillful contribution to the study.
IRBio	This study was supported by the Spanish Ministry of Science and Innovation grant BFU2010-15484 and by the ICREA Academia (Generalitat de Catalunya) to J.R.
kConFab	kConFab is supported by grants from the National Breast Cancer Foundation, the National Health and Medical Research Council (NHMRC) and by the Queensland Cancer Fund, the Cancer Councils of New South Wales, Victoria, Tasmania and South Australia, and the Cancer Foundation of Western Australia. The kConFab Follow-Up Study has received funding from the Australian NHMRC, the National Breast Cancer F…	We wish to thank Heather Thorne, Eveline Niedermayr, all the kConFab research nurses and staff, the heads and staff of the Family Cancer Clinics for their contributions to this resource, and the many families who contribute to kConFab.	Morteza Aghmesheh, David Amor, Lesley Andrews, Yoland Antill, Shane Armitage, Leanne Arnold, Rosemary Balleine, Agnes Bankier, Patti Bastick, Jonathan Beesley, John Beilby, Barbara Bennett, Ian Bennett, Geoffrey Berry, Anneke Blackburn, Michael Bogwitz , Meagan Brennan, Melissa Brown, Michael Buckley, Matthew Burgess , Jo Burke, Phyllis Butow, Keith Byron, David Callen, Ian Campbell, Deepa Chauha…
MAYO	MAYO is supported by NIH grant CA128978, an NCI Specialized Program of Research Excellence (SPORE) in Breast Cancer (CA116201), a U.S. Department of Defence Ovarian Cancer Idea award (W81XWH-10-1-0341) and grants from the Breast Cancer Research Foundation.	Genotyping was performed by the Genotyping Core Laboratory in the Mayo Clinic Medical Genome Facility.
MCGILL	Jewish General Hospital Weekend to End Breast Cancer, Quebec Ministry of Economic Development, Innovation and Export Trade.
MODSQUAD	The work was supported by the European Regional Development Fund and the State Budget of the Czech Republic (RECAMO, CZ.1.05/2.1.00/03.0101) and MH CZ - DRO (MMCI, 00209805).
MSKCC	MSKCC is supported by Breast Cancer Research Foundation, the Niehaus Family Genetics Research Fund, and the STARR Cancer Consortium Grants.
NAROD	1R01 CA149429-01
NCI	The research of Drs. Mark H. Greene and Phuong L. Mai was supported by the NCI Intramural Research Program, National Institutes of Health, and by support services contracts NO2-CP-11019-50 and N02-CP-65504 with Westat, Inc, Rockville, MD. This study was supported by National Cancer Institute grants to the Gynecologic Oncology Group (GOG) Administrative Office and Tissue Bank (CA 27469), the GOG S…
NICCC	NICCC is supported by Clalit Health Services in Israel. Some of it's activities are supported by the Israel Cancer Association and the Breast Cancer Research Foundation (BCRF), NY.	We wish to thank the NICCC National Familial Cancer Consultation Service team led by Sara Dishon, the lab team led by Dr. Flavio Lejbkowicz, and the research field operations team led by Dr. Mila Pinchev.
NNPIO	This work has been supported by the Russian Federation for Basic Research (grants 13-04-92613, 14-04-93959 and 15-04-01744).
OCGN	This work was supported by the Canadian Institutes of Health Research for the “CIHR Team in Familial Risks of Breast Cancer” program and grant UM1 CA164920 from the National Cancer Institute. The content of this manuscript does not necessarily reflect the views or policies of the National Cancer Institute or any of the collaborating centers in the Breast Cancer Family Registry (BCFR), nor does me…	Nayana Weerasooriya, Teresa Selander, OCGN participants and staff.
OSU CCG	OSUCCG is supported by the Ohio State University Comprehensive Cancer Center.	Leigha Senter, Kevin Sweet, Caroline Craven and Michelle O'Conor were instrumental in accrual of study participants, ascertainment of medical records and database management. Samples were processed by the OSU Human Genetics Sample Bank.
SMC	This project was partially funded through a grant by the Isreal cancer association and the funding for the Israeli Inherited breast cancer consortium.	SMC team wishes to acknowledge the assistance of the Meirav Comprehensice breast cancer center team at the Sheba Medical Center for assistnace in this study.
SWE-BRCA	SWE-BRCA collaborators are supported by the Swedish Cancer Society.	Swedish scientists participating as SWE-BRCA collaborators are: from Lund University and University Hospital: Åke Borg, Håkan Olsson, Helena Jernström, Karin Henriksson, Katja Harbst, Maria Soller, Niklas Loman, Ulf Kristoffersson; from Gothenburg Sahlgrenska University Hospital: Anna Öfverholm, Margareta Nordling, Per Karlsson, Zakaria Einbeigi; from Stockholm and Karolinska University Hospital:…	Lund University and University Hospital: Håkan Olsson, Helena Jernström, Karin Henriksson, Katja Harbst, Maria Soller, Ulf Kristoffersson; Gothenburg Sahlgrenska University Hospital: Anna Öfverholm, Margareta Nordling, Per Karlsson, Zakaria Einbeigi; Stockholm and Karolinska University Hospital: Anna von Wachenfeldt, Annika Lindblom, Brita Arver, Gisela Barbany Bustinza; Umeå University Hospital:…
UCHICAGO	UCHICAGO is supported by NCI Specialized Program of Research Excellence (SPORE) in Breast Cancer (CA125183), R01 CA142996, 1U01CA161032 and by the Ralph and Marion Falk Medical Research Trust, the Entertainment Industry Fund National Women's Cancer Research Alliance and the Breast Cancer research Foundation. OIO is an ACS Clinical Research Professor.	We wish to thank Cecilia Zvocec,Qun Niu, physicians, genetic counselors, research nurses and staff of the Cancer Risk Clinic for their contributions to this resource, and the many families who contribute to our program.
UCSF	UCSF Cancer Risk Program and Helen Diller Family Comprehensive Cancer Center.	We would like to thank Dr. Robert Nussbaum and the following genetic counselors for participant recruitment: Beth Crawford, Kate Loranger, Julie Mak, Nicola Stewart, Robin Lee, Amie Blanco and Peggy Conrad. And thanks to Ms. Salina Chan for her data management.
UPENN	National Institutes of Health (NIH) (R01-CA102776 and R01-CA083855; Breast Cancer Research Foundation; Rooney Family Foundation; Susan G. Komen Foundation for the cure, Basser Research Center for BRCA.
WCP	The Women's Cancer Program (WCP) at the Samuel Oschin Comprehensive Cancer Institute is funded by the American Cancer Society Early Detection Professorship (SIOP-06-258-01-COUN).
